# Supplementary material
Source: PubMed Central journal article supplement (PMC1783392)

# dimer unit

# monomer unit

**A**: Fig. 4A

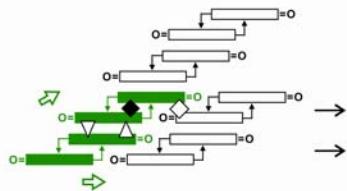

**B**

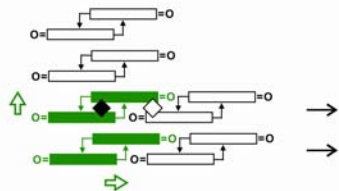

**C**: Fig. 4B

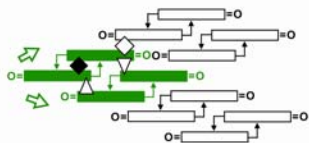

**D**

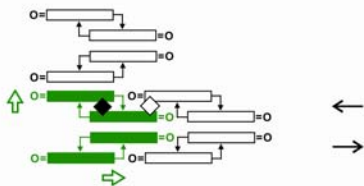

**E**: Fig. 4C

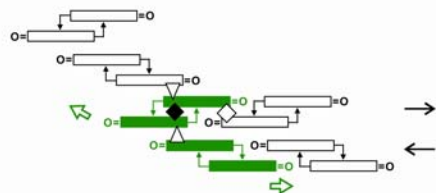

**F**

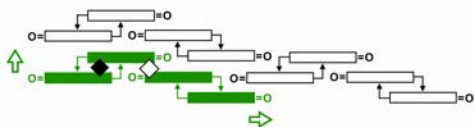

**G**

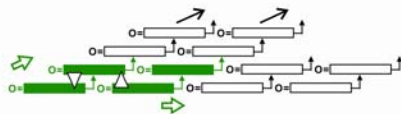

**H**: Fig. 4D

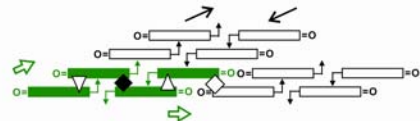

**I**

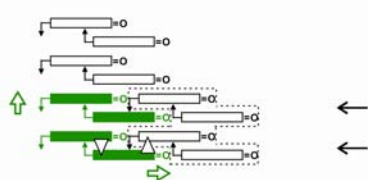

**J**

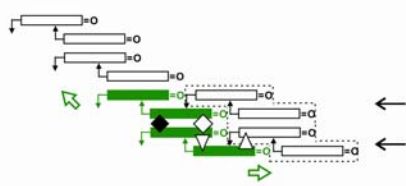

**K**

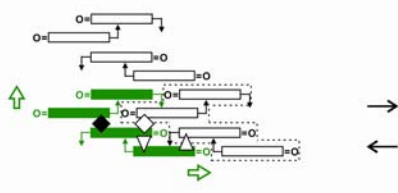

**L**

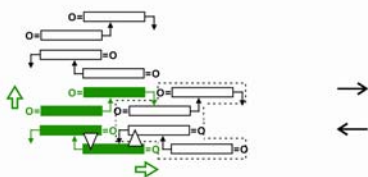

Supplement: pnas_0605911104_1.pdf [file pnas_0605911104_1.pdf]

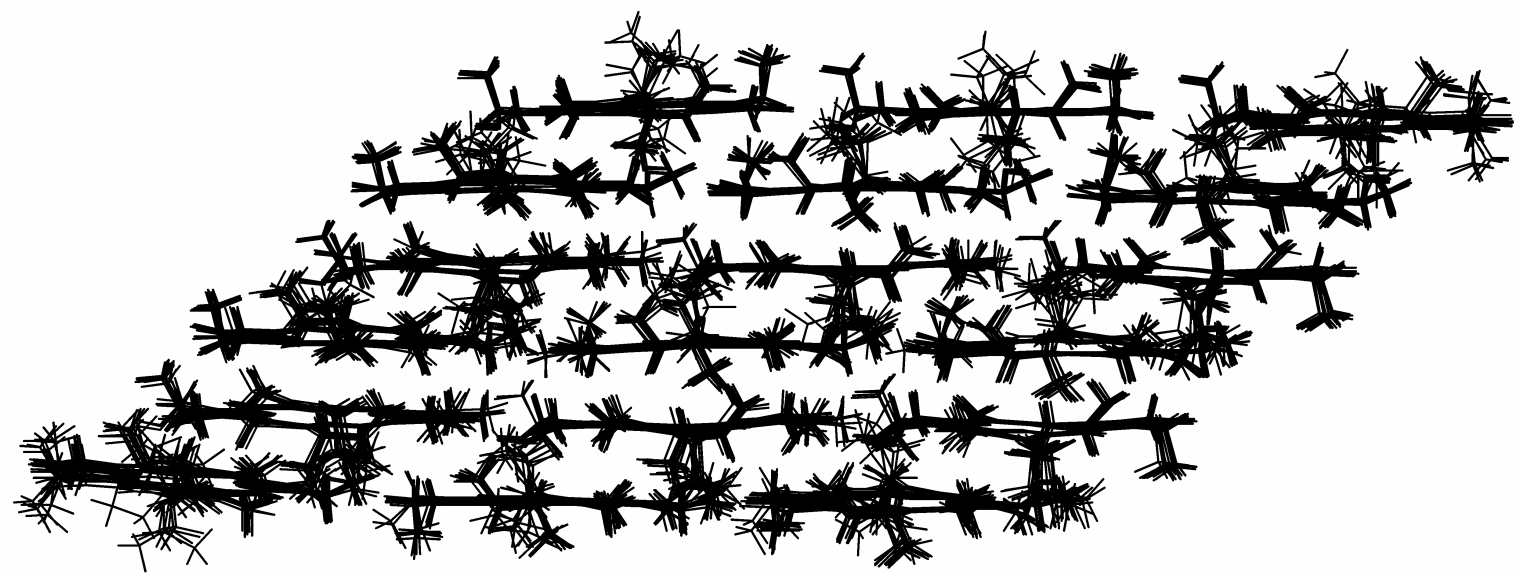

Supplement: pnas_0605911104_2.pdf [file pnas_0605911104_2.pdf]
